# Secretory Phosphatases Deficient Mutant of *Mycobacterium tuberculosis* Imparts Protection at the Primary Site of Infection in Guinea Pigs

Priyanka Chauhan<sup>1</sup>, P. Vineel Reddy<sup>1</sup>, Ramandeep Singh<sup>1\*</sup>, Neetika Jaisinghani<sup>2</sup>, Sheetal Gandotra<sup>2</sup>, Anil K. Tyagi<sup>1\*</sup>

<sup>1</sup> Department of Biochemistry, University of Delhi South Campus, New Delhi, India, <sup>2</sup> CSIR-Institute of Genomics and Integrative Biology, New Delhi, India

## Abstract

**Background:** The failure of *Mycobacterium bovis* Bacille Calmette-Guérin to impart satisfactory protection against adult pulmonary tuberculosis has necessitated the development of more effective TB vaccines. The assumption that the vaccine strain should be antigenically as similar as possible to the disease causing pathogen has led to the evaluation of *M.tuberculosis* mutants as candidate tuberculosis vaccines.

**Methods/Principal Findings:** In this study, we have generated a mutant of *M.tuberculosis* (*MtbΔmms*) by disrupting 3 virulence genes encoding a mycobacterial secretory acid phosphatase (*sapM*) and two phosphotyrosine protein phosphatases (*mptpA* and *mptpB*) and have evaluated its protective efficacy in guinea pigs. We observed that *MtbΔmms* was highly attenuated in THP-1 macrophages. Moreover, no bacilli were recovered from the lungs and spleens of guinea pigs after 10 weeks of *MtbΔmms* inoculation, although, initially, the mutant exhibited some growth in the spleens. Subsequently, when *MtbΔmms* was evaluated for its protective efficacy, we observed that similar to BCG vaccination, *MtbΔmms* exhibited a significantly reduced CFU in the lungs of guinea pigs when compared with the unvaccinated animals at 4 weeks after challenge. In addition, our observations at 12 weeks post challenge demonstrated that *MtbΔmms* exhibited a more sustainable and superior protection in lungs as compared to BCG. However, the mutant failed to control the hematogenous spread as the splenic bacillary load between *MtbΔmms* vaccinated and sham immunized animals was not significantly different. The gross pathological observations and histopathological observations corroborated the bacterial findings. In spite of disruption of phosphatase genes in *MtbΔmms*, the lipid profiles of *M.tuberculosis* and *MtbΔmms* were identical indicating thereby that the phenotype of the mutant was ascribed to the loss of phosphatase genes and the influence was not related to any alteration in the lipid composition.

**Conclusions/Significance:** This study highlights the importance of *M.tuberculosis* mutants in imparting protection against pulmonary TB.

**Citation:** Chauhan P, Reddy PV, Singh R, Jaisinghani N, Gandotra S, et al. (2013) Secretory Phosphatases Deficient Mutant of *Mycobacterium tuberculosis* Imparts Protection at the Primary Site of Infection in Guinea Pigs. PLoS ONE 8(10): e77930. doi:10.1371/journal.pone.0077930

**Editor:** Jean Louis Herrmann, Hopital Raymond Poincare - Universite Versailles St. Quentin, France

**Received:** March 30, 2013; **Accepted:** September 6, 2013; **Published:** October 18, 2013

**Copyright:** © 2013 Chauhan et al. This is an open-access article distributed under the terms of the Creative Commons Attribution License, which permits unrestricted use, distribution, and reproduction in any medium, provided the original author and source are credited.

**Funding:** This work was supported by a research grant from the Department of Biotechnology, Government of India, India. Council of Scientific and Industrial Research, Government of India is acknowledged for Junior/Senior research fellowships to PC. The funders had no role in study design, data collection and analysis, decision to publish, or preparation of the manuscript.

**Competing interests:** Co-author Prof. Anil K. Tyagi is a member of the PLOS ONE Editorial Board and this does not alter the authors' adherence to all the PLOS ONE policies on sharing data and materials.

\* E-mail: anilityagi@south.du.ac.in

‡ Current address: Vaccine and Infectious Disease Research Centre, Translational Health Science and Technology Institute, Gurgaon, Haryana, India

## Introduction

Tuberculosis (TB) continues to intimidate human race unabashedly and remains a major cause of morbidity and mortality throughout the world [1,2]. Every week, more than 150,000 individuals develop TB and ~30,000 human lives are lost globally due to this dreaded disease. The lethal liaison between TB and HIV infections and the emergence of various

forms of drug resistant *M.tuberculosis* strains have made the situation even more precarious [3,4]. Although, the current vaccine, *Mycobacterium bovis* Bacille Calmette-Guérin (BCG) does provide protection against childhood TB especially TB meningitis, it is ineffective in providing consistent protection against the disease in adults and older people [5]. Under the best of the circumstances, it has provided 80% protection, which generally has been to the tune of 40-60% on an average.

Therefore, the need to develop a superior TB vaccine than BCG cannot be over-emphasized.

The purpose of an effective live vaccine would be best served if the vaccine strain is antigenically as similar as possible to the disease-causing pathogen in order for it to generate the host immune responses that mimic natural infection [6]. Comparative genomic studies have revealed that BCG, in comparison to *M. tuberculosis*, lacks 16 defined regions (RD1-16) comprising of ~150 genes, some of which are known to encode potential antigenic determinants that could increase the immunogenicity of a vaccine [7,8]. This makes the use of attenuated *M. tuberculosis* strains rather than BCG, for the generation of appropriate immune responses, an attractive idea [5,9,10]. Several *M. tuberculosis* mutants have been evaluated in animal models and have resulted in varying degrees of success in imparting protection against TB when compared with BCG [11–15]. Immunization of mice with the  $\Delta$ RD1 $\Delta$ panCD mutant of *M. tuberculosis* (an attenuated *M. tuberculosis* RD1 knockout and pantothenate auxotroph) resulted in 1-2 log<sub>10</sub> CFU lower bacillary loads in the spleens, lungs and liver when compared with the BCG. However, in bull calves, no histopathological differences were observed in the lung and lymph nodes of  $\Delta$ RD1 $\Delta$ panCD vaccinees when compared with the unvaccinated controls [14,15]. Similarly, mice vaccinated with  $\Delta$ secA2 mutant (sec A2 deletion mutant of *M. tuberculosis*) exhibited significantly lower pulmonary and splenic CFU when compared with the BCG vaccinated group, however, the same vaccine performed as well as BCG in guinea pigs [11]. In contrast to these observations, Martin et al. demonstrated similar level of protection exhibited by SO2 strain (*phoP* deletion mutant of *M. tuberculosis*) in mice, although guinea pigs vaccinated with SO2 exhibited significantly increased survival time when compared with BCG [12]. The variable results shown by the candidate vaccines and the fact that none of the current candidates has successfully made through the clinical trials reinforce the importance of keeping the pipeline full with the new candidates [16].

Among the secretory proteins of *M. tuberculosis*, three phosphatases, namely, mycobacterial secretory acid phosphatase (*SapM*) and two phosphotyrosine protein phosphatases (*MptpA* and *MptpB*) have been shown to contribute to its pathogenicity [17–20]. *SapM* dephosphorylates phosphatidylinositol 3-phosphate (PI3P), a membrane trafficking regulatory lipid, resulting in the arrest of phagosome maturation [19]. In addition, in a study by Festjens et al, disruption of *sapM* locus in BCG improved its protective efficacy as a vaccine against TB [21]. The increased efficacy of the vaccine was accredited to the efficient activation and recruitment of dendritic cells to the draining lymph nodes in the absence of *SapM*, thus allowing successful antigen presentation and activation of the adaptive immunity by dendritic cells [21]. A recent study showed that the *fbpA/sapM* double mutant of *M. tuberculosis* was attenuated for growth and more immunogenic in macrophages as compared to *M. tuberculosis* [22].

*MptpA* has been demonstrated to block phagosome-lysosome fusion by inhibiting V-ATPase trafficking to the mycobacterial phagosome [23–25]. It has been reported that

*mptpA* mutant of *M. tuberculosis* was impaired for survival/growth in THP-1 macrophages and phagosomes harboring the mutant strain exhibited increased phagosome-lysosome fusion [23]. It has been previously reported that *M. tuberculosis* devoid of *MptpB* activity was impaired for survival in IFN- $\gamma$  activated macrophages and in guinea pigs [26]. In another study, it was shown that *MptpB* inhibits ERK 1/2, p38 signaling pathways and caspase 3 activity, thus subverting the host immune response to infection [27]. The importance of *MptpB* in the intracellular survival of *M. tuberculosis* was also demonstrated in a study in which specific inhibitors against *MptpB* were shown to inhibit mycobacterial survival within murine macrophages [17,27].

In this study, by deleting the function of three virulence genes, namely, *mptpA* (*Rv2234*), *mptpB* (*Rv0153c*) and *sapM* (*Rv3310*), we have developed the mutant *Mtb* $\Delta$ *mms* and evaluated its protective efficacy in guinea pig model of experimental tuberculosis.

## Materials and Methods

### Bacterial strains and growth conditions

The bacterial strains and plasmids used in this study are listed in Table 1. *M. bovis* BCG (Danish strain) was obtained from BCG laboratories, Chennai, India. *M. tuberculosis* H37Rv (ATCC No. 25618) used for challenge was procured from Dr. J. S. Tyagi, AIIMS, New Delhi, India. Mycobacterial strains were grown to mid-log phase in MB7H9 medium supplemented with 1X albumin-dextrose-catalase (ADC), 0.5% glycerol and 0.05% Tween 80. PBS stocks were prepared and stored at -80°C till further use. The CFU of stocks was enumerated by plating appropriate dilutions in duplicates on MB7H11 agar supplemented with 1X oleic acid-albumin-dextrose-catalase (OADC) and 0.5% glycerol. *E. coli* strains, XL-1 Blue (Stratagene) and HB101 (Life Technologies) were used for cloning purposes. Kanamycin and Chloramphenicol were used at 25  $\mu$ g/ml and 30  $\mu$ g/ml, respectively. Hygromycin was used at 50  $\mu$ g/ml for *M. tuberculosis* and at 150  $\mu$ g/ml for *E. coli*.

### Generation of *Mtb* $\Delta$ *mms* Mutant of *M. tuberculosis*

To generate *Mtb* $\Delta$ *mms* mutant of *M. tuberculosis*, a portion of *mptpA* and *sapM* was deleted in the genome of *Mtb* $\Delta$ *mptpB* [26] and replaced with Kanamycin resistance cassette and Chloramphenicol resistance cassette, respectively. For the generation of *Mtb* $\Delta$ *mptpB* $\Delta$ *mptpA* double gene mutant, primers were designed to amplify (i) 156 bp of 5' proximal end of *mptpA* along with 1135 bp of immediate upstream region of *mptpA* (amplicon I) and (ii) 167 bp of 3' distal end of *mptpA* along with 1240 bp of immediate downstream region of *mptpA* (amplicon II). The amplicons I and II were PCR amplified and cloned into the vector pLITmus-38 (New England Biolabs) to generate the vector pLIT $\Delta$ A (with a deletion of 169 bp from the central region of *mptpA* ORF). The Kanamycin resistance gene was excised out from pSD5 as an *NheI*-*BstEII* fragment, end-repaired and cloned into *NdeI* digested, end-repaired pLIT $\Delta$ A to generate pLIT38 $\Delta$ AK. The vector pLIT38 $\Delta$ AK was pretreated with alkali [28] and 2  $\mu$ g of DNA was electroporated into *Mtb* $\Delta$ *mptpB* electrocompetent cells to generate a double gene mutant, namely, *Mtb* $\Delta$ *mptpB* $\Delta$ *mptpA*.

**Table 1.** Bacterial strains, plasmids, cell line and primers used in this study.

| Strains/Plasmids/Cell                         |                                                                                                                                |                                          |
|-----------------------------------------------|--------------------------------------------------------------------------------------------------------------------------------|------------------------------------------|
| line/Primers                                  | Description                                                                                                                    | Reference                                |
| <b>Strains</b>                                |                                                                                                                                |                                          |
| <i>E. coli</i> XL-1 Blue                      | <i>endA1 gyrA96 (nalR) thi-1 recA1 relA1 lac glnV44 F' [::Tn10 proAB + lacIq Δ (lacZ) M15] hsdR17 (rK- mK+)</i>                | Stratagene, Heidelberg, Germany          |
| <i>E. coli</i> HB101                          | <i>F-(gpt-proA) 62 leuB6 glnV44 ara-14 galK2 lacY1 (mcrC-mrr) rpsL20 (Strr) xyl-5 mtl-1 recA13</i>                             | Life Technologies, CA, USA               |
| MtbΔ <i>mptpB</i>                             | <i>M. tuberculosis</i> Erdman <i>mptpB</i> mutant                                                                              | [26]                                     |
| MtbΔ <i>mptpB</i> Δ <i>mptpA</i>              | <i>M. tuberculosis</i> <i>mptpB</i> and <i>mptpA</i> mutant                                                                    | This study                               |
| MtbΔ <i>mms</i>                               | <i>M. tuberculosis</i> <i>mptpA</i> , <i>mptpB</i> and <i>sapM</i> mutant                                                      | This Study                               |
| <i>M. tuberculosis</i> H37Rv (ATCC No. 25618) | Virulent strain of <i>M. tuberculosis</i>                                                                                      | Dr. J. S. Tyagi, AIIMS, New Delhi, India |
| <i>M. bovis</i> BCG Danish                    | Vaccine strain against tuberculosis                                                                                            | BCG laboratories, Chennai, India         |
| <b>Plasmids</b>                               |                                                                                                                                |                                          |
| pLITΔA                                        | pLitmus vector carrying the amplicons of <i>mptpA</i> with a deletion of 169 bp from the central region of ORF                 | This study                               |
| pLITΔAK                                       | pLitmus vector with kanamycin resistance gene cassette flanked with <i>mptpA</i> amplicons                                     | This study                               |
| pYUBΔ <i>SapM</i>                             | Cloning vector with Hygromycin resistance gene cassette flanked with <i>sapM</i> amplicons                                     | unpublished data                         |
| pYUB.CAT <i>trm</i> Δ <i>sapM</i>             | Cloning vector with Chloramphenicol resistance gene under mycobacterial <i>trm</i> promoter flanked with <i>sapM</i> amplicons | This study                               |
| pVR1                                          | A derivative of pSD5 containing Chloramphenicol resistance gene under mycobacterial <i>trm</i> promoter                        | [51]                                     |
| <b>Cell line</b>                              |                                                                                                                                |                                          |
| THP-1                                         | The Human acute monocytic leukemia cell line                                                                                   | NCCS, Pune, India                        |
| <b>Primers</b>                                |                                                                                                                                |                                          |
| F- <i>mptpA</i>                               | 5'-gtgtctgatccgctgcacgtcacattc-3'                                                                                              | This study                               |
| R- <i>mptpA</i>                               | 5'-tcaactcgggtccgtccgcgagac-3'                                                                                                 | This study                               |
| F- <i>sapM</i>                                | 5'-atgctccgcggaatccaggctc-3'                                                                                                   | This study                               |
| R- <i>sapM</i>                                | 5'-ctagtcgccccaaatatcgg-3'                                                                                                     | This study                               |

doi: 10.1371/journal.pone.0077930.t001

For the generation of MtbΔ*mms* mutant of *M. tuberculosis*, *sapM* was disrupted in MtbΔ*mptpB*Δ*mptpA*. For this, we employed a modified pYUBΔ*sapM* vector generated in our laboratory (Table 1) by replacing hygromycin resistance cassette in pYUBΔ*sapM* with the Chloramphenicol resistance gene expressed under the mycobacterial *trm* promoter, CAT*trm*. Briefly, primers were designed to amplify (i) ~700 bp

amplicon comprising of ~200 bp of 5' proximal end of *sapM* and ~500 bp of immediate upstream region of *sapM* (amplicon I) and (ii) ~700 bp amplicon comprising of ~200 bp of 3' distal end of *sapM* and ~500 bp of immediate downstream region of *sapM* (amplicon II). Both amplicons were cloned into pYUB854 flanking the hygromycin resistance cassette to generate pYUBΔ*sapM*. The hygromycin resistance cassette in pYUBΔ*sapM* was replaced with CAT*trm* (The CAT*trm* was PCR amplified from pVR1, Table 1) resulting in pYUB.CAT*trm*Δ*sapM*. A linear Allelic Exchange Substrate (AES), Δ*sapM*::CAT*trm* was then excised out as *KpnI*/*SpeI* fragmentation and electroporated into MtbΔ*mptpB*Δ*mptpA* to generate the mutant which was designated as MtbΔ*mms* (*mptpA*, *mptpB* and *sapM*).

### Confirmation of deletion of *mptpA* and *sapM* by Southern hybridization

To confirm the deletion of *mptpA* in MtbΔ*mptpB*Δ*mptpA*, the genomic DNA was isolated from the parental strain (MtbΔ*mptpB*) and the mutant strain (MtbΔ*mptpB*Δ*mptpA*) followed by the digestion of 2 μg of DNA with *PvuII*. The deletion of *sapM* in MtbΔ*mms* was confirmed by isolating the genomic DNA from MtbΔ*mptpB*Δ*mptpA* and MtbΔ*mms*, followed by digestion of 2 μg of DNA with *PstI*. DNA was electrophoresed through 1% agarose gel followed by depurination, denaturation and neutralization of DNA within the agarose gel. DNA was then transferred onto positively charged nylon membrane by capillary transfer overnight and immobilized by UV radiation. 200 bp region at 5' termini of *mptpA* and *sapM* were amplified for the generation of probe. The probe labeling, subsequent pre-hybridization, hybridization and detection were performed as described in the DIG High Prime DNA Labeling and Detection Starter Kit II (Roche Applied Science, IN, USA).

### Lipid profile analysis

**Isolation of mycolic acids.** Mycolic acids were extracted from *M. tuberculosis* as well as MtbΔ*mms* as described previously [29]. Briefly, mycobacterial strains were grown in 50 ml of MB7H9 supplemented with 1X ADC to an A<sub>600</sub> of 1.0. The culture was harvested, heat killed (95°C for 1 hr) and then saponified with 6 ml of 20% tetrabutylammonium hydroxide at 100°C, overnight, to hydrolyze the mycolic acids from the cell wall. Free mycolic acids so generated were methylated by adding 1:1 dichloromethane methylechlorid and 300 μl of methyl iodide to form mycolic acid methyl esters. Upon phase separation, the lower organic layer was collected, dried and re-suspended in diethyl ether (3 ml). This lipid suspension was centrifuged at 2500 rpm for 2-3 min and the supernatant was collected and dried. The crystals thus formed, were suspended in 900 μl of a mixture of toluene and acetonitrile (2: 1). The solution was transferred to a microcentrifuge tube followed by addition of 600 μl of acetonitrile to the suspension. The suspension was then frozen at -20°C overnight. The solution was centrifuged at 12000 rpm at 4°C for 15 min. Finally, the pellet was suspended in 500 μl of diethyl ether and transferred to a small glass tube and evaporated with liquid nitrogen. The equivalent amount of mycolic acids extracted from

*M. tuberculosis* as well as *MtbΔmms*, suspended in diethyl ether were spotted on a thin layer chromatography (TLC) plate (Merck, TLC Aluminium sheets silica gel 60), chromatographed in hexane: ethylacetate (95: 5, v/v) seven times and visualized by staining with 20% sulphuric acid in ethanol followed by charring.

**Extraction of polar and apolar lipids.** Mycobacterial lipids were extracted as described previously [30]. Briefly, 50 ml of mycobacterial cultures, grown in MB7H9 supplemented with 1X ADC, were harvested at an  $A_{600nm}$  of 1.0 and heat killed (95°C for 1 hr). Apolar lipids were extracted by adding 2 ml of methanolic solution of 0.3% sodium chloride and 1 ml of petroleum ether (60-80°C) to the cell pellet. The cell suspension was mixed end-over-end for 30 min followed by centrifugation at 2500 rpm for 10 min. The upper layer consisting of apolar lipids was collected in a separate vial and 1 ml of petroleum ether was added to the lower layer, vortexed and mixed end-over-end for 15 min. The cell suspension was again centrifuged to recollect the upper layer. The upper layers comprising of apolar lipids were pooled and dried at 60°C.

Further, the polar lipids were extracted by adding 2.3 ml of chloroform: methanol: 0.3% sodium chloride (90: 100: 30, v/v/v) to the bottom layer. The cell suspension was mixed end-over-end for 60 min followed by centrifugation at 2500 rpm for 10 min. Polar lipids, present in the supernatant fraction, were collected and the pellet was further treated twice with 750  $\mu$ l of chloroform: methanol: 0.3% sodium chloride (50: 100: 40, v/v/v), to obtain all polar lipids. The supernatants from these three extractions were pooled and further extracted with 1.3 ml of chloroform and 1.3 ml of 0.3% sodium chloride. The lower layer comprising of polar lipids was collected into a fresh glass tube and dried at 60°C. Equivalent amounts of polar and apolar lipids suspended in chloroform: methanol (2: 1, v/v) from both *M. tuberculosis* and *MtbΔmms* strains were then spotted on TLC plates and analysed for different lipid fractions by using different solvent system as described in Table S1. TLC plates were developed by dipping in 10% phosphomolybdate or spraying with 2% orcinol in 10% sulphuric acid (for solvent C) followed by charring.

For the detection of trehalose monomycolate (TMM), trehalose dimycolate (TDM) and sulfolipids (SL), 5  $\mu$ Ci of <sup>14</sup>C-acetate was added to 10 ml of log phase culture of both *M. tuberculosis* and *MtbΔmms* strains, separately. Cultures were then harvested after 18 hrs of radioactive pulse and apolar lipids were extracted from a methanolic solution of 0.3% sodium chloride and petroleum ether as described above. The organic phase was suspended in chloroform: methanol (2: 1, v/v). Approximately, 25,000 counts from the samples belonging to each strain were spotted on the TLC plate followed by chromatography in the appropriate solvents (Table S1). The lipids were visualized with a Typhoon FLA 700 Phosphorimager.

### Comparison of the growth of *MtbΔmms* and the parental strain in human macrophages

Human monocytic THP-1 cells were cultured in complete RPMI-GlutaMAX™ medium [containing 10% heat inactivated FBS and 1% antibiotic-antimycotic mix] (GIBCO Grand Island,

NY, USA) and were differentiated to macrophages by the addition of 30 nM Phorbol 12-myristate 13-acetate (PMA, Sigma) for 16 hrs at 37°C, 5% CO<sub>2</sub>. Cells were washed with complete RPMI medium and rested for 2 hrs in fresh medium without antibiotic-antimycotic mix before infection. For infection, 5 x 10<sup>5</sup> macrophages were infected with 5 x 10<sup>5</sup> mycobacteria to achieve an MOI of 1:1 in 24 well plates for 4 hrs in triplicates [31]. Following infection, the extracellular bacteria were removed by overlaying the cells with RPMI medium containing 200  $\mu$ g/ml amikacin for 2 hrs. At designated time points, day 0 (4 hrs), 2, 4 and 6, macrophages were lysed by the addition of 0.025% SDS and intracellular bacteria were enumerated by plating appropriate dilutions on MB7H11 agar. Colonies were counted after 4 weeks of incubation at 37°C and the data was expressed as CFU/ml.

### Experimental animals

Pathogen-free outbred female guinea pigs (200-300 g) of the Duncan-Hartley strain were procured from Disease Free Small Animal House Facility, Lala Lajpat Rai University, Hissar, India. The animals were housed in individually ventilated cages and were provided with food and water *ad libitum* in a BSLIII facility at University of Delhi South Campus (UDSC), New Delhi, India.

### Ethics statement

Guinea pig experiments included in this manuscript were reviewed and approved by the Institutional Animal Ethics Committee of University of Delhi South Campus, New Delhi, India (Ref. No. IAEC/AKT/Biochem/UDSC/24.08.2010). All animals were routinely cared for, according to the guidelines of CPCSEA (Committee for the Purpose of Control and Supervision of Experiments on Animals), India. Guinea pigs were vaccinated intradermally with mycobacterial strains by injecting not more than 100  $\mu$ l and were euthanized, whenever required, by CO<sub>2</sub> asphyxiation and all efforts were made to ameliorate animal suffering.

### Influence of deletion of phosphatase genes on the pathogenicity of *M. tuberculosis*

To evaluate whether the *MtbΔmms* mutant was sufficiently attenuated for its use as a vaccine, animals (n=6) were inoculated intradermally (i.d.) with 5 x 10<sup>5</sup> bacilli of either *M. tuberculosis* or *MtbΔmms* or BCG in 100  $\mu$ l of saline. Animals were euthanized at 4 weeks and 10 weeks post inoculation by CO<sub>2</sub> asphyxiation. Lungs, liver and spleen were scored for gross pathological damage such as tissue involvement, areas of inflammation, extent of necrosis and number/size of tubercles due to infection. The scores given to these organs were graded from 1-4 and were based on the modified Mitchison scoring system [32]. For histopathological evaluation, the right lung and a portion of left dorsal lobe of liver were removed and fixed in 10% buffered formalin. 5  $\mu$ m thick sections of formalin fixed, paraffin embedded lung tissues were stained with haematoxylin and eosin (H & E). The tissues were coded and the coded samples were evaluated by a certified pathologist having no knowledge of the experimental groups. Left caudal lung lobe and caudal portion of spleen were aseptically removed for the measurement of the bacillary

load. The specific portions of lungs and spleen were weighed and homogenized separately in 5 ml saline by using a polytron homogenizer. Appropriate dilutions of the homogenates were plated on to MB7H11 agar plates in duplicates and incubated at 37°C for 3-4 weeks. The number of colonies was counted and expressed as mean log<sub>10</sub> CFU/organ.

### Evaluation of protective efficacy of MtbΔmms against *M. tuberculosis* infection

Guinea pigs were divided into 3 groups (n=8) and the animals were immunized intradermally with 5 x 10<sup>5</sup> CFU of either (i) BCG or (ii) MtbΔmms in 100 μl of saline. In the control group, guinea pigs were injected with 100 μl of saline. Twelve weeks post immunization, guinea pigs were infected with a low dose of virulent *M. tuberculosis* via the respiratory route in an aerosol chamber (Inhalation Exposure System, Glascol Inc.), pre calibrated to deliver 10-30 bacilli in lungs per animal. Guinea pigs were euthanized at 4 weeks and 12 weeks after challenge and evaluated for bacterial load, gross pathological and histopathological changes in various organs as described in the previous section. A significant reduction in these parameters in vaccinated animals was considered as a protective effect of the vaccine.

### Statistical analyses

For comparison between the groups, Non-parametric Kruskal–Wallis test followed by Mann–Whitney U-test, One-way analysis of variables (ANOVA) with Tukey post-test, Two-way ANOVA with Bonferroni multiple comparison test and student's *t*-test were employed, wherever appropriate. Differences were considered significant when *p*<0.05. For statistical analyses and generation of graphs, Prism 5 software (Version 5.01; GraphPad Software Inc., CA, USA) was used.

## Results

### Functional disruption of *mptpA* and *sapM* in MtbΔ*mptpB* and characterization of the multigene mutant

To generate triple gene mutant of *M. tuberculosis*, we first disrupted *mptpA* in MtbΔ*mptpB* (published from our laboratory previously, [26]) to generate MtbΔ*mptpB*Δ*mptpA* (Figure 1A). Deletion of *mptpA* was confirmed by three approaches (1). PCR by using *mptpA* gene specific primers (Table 1, Figure 1B). In the case of MtbΔ*mptpB*, a 0.5 kb amplicon representing the complete *mptpA* gene was amplified as expected, while in the case of MtbΔ*mptpB*Δ*mptpA*, an amplicon of 2.0 kb was observed indicating the disruption of *mptpA* by Kanamycin resistance cassette (2). Southern hybridization. In the case of MtbΔ*mptpB* strain, the probe hybridized to a 0.5 kb (lane 1) *PvuII* fragment whereas disruption of *mptpA* gene by Kanamycin resistance cassette resulted in a signal at 2.4 kb (lane 2) in the MtbΔ*mptpB*Δ*mptpA* strain (Figure 1C) (3). Nucleotide sequencing. Both 0.5 kb and 2.0 kb amplification products were DNA sequenced that further confirmed the disruption of *mptpA* in MtbΔ*mptpB*Δ*mptpA*. Further, the *sapM* gene was deleted in MtbΔ*mptpB*Δ*mptpA* by employing linear

AES to generate MtbΔ*mms* (Figure 1D). The triple gene mutant was confirmed by PCR by employing *sapM* gene specific primers (Table 1, Figure 1E). The primers yielded an amplicon of 0.9 kb in MtbΔ*mptpB*Δ*mptpA*, however, the deletion of *sapM* gene resulted in a PCR amplicon of 1.5 kb in MtbΔ*mms* (Figure 1E) (2). Southern hybridization. The probe in the MtbΔ*mptpB*Δ*mptpA* hybridized to a 3.0 kb (lane 1) *PvuII* fragment whereas disruption of *sapM* gene by Chloramphenicol resistance cassette resulted in a signal at 1.5 kb (lane 2) in the MtbΔ*mms* strain (Figure 1F) (3). Nucleotide sequencing. Both 0.9 kb and 1.5 kb amplification products were DNA sequenced that further confirmed the disruption of *sapM* in MtbΔ*mms*. Deletion of *mptpA* and *sapM* was further confirmed by immunoblot analysis by using polyclonal antibodies raised against MptpA and SapM. As shown in Figure 1G and Figure 1H, we did not observe any expression of MptpA and SapM in MtbΔ*mms*.

### Disruption of Phosphatases Does Not Alter the Lipid Profile of MtbΔmms

To ascertain whether the disruption of phosphatase genes had any influence on the lipid composition of the mutant, we performed a total lipid analysis of the parental as well as the mutant strain by TLC. *M. tuberculosis* and MtbΔ*mms* were analysed for the well known characteristic lipids of the tubercle bacillus. The apolar and polar lipid fractions were extracted and assayed for phthiocerol dimycocerosate (PDIM), triacylglycerol (TAG), mycolic acids, free fatty acids, diacylglycerol (DAG), diacyltrehalose (DAT), trehalose monomycolate (TMM), trehalose dimycolate (TDM), glucose monomycolate (GMM), sulfolipids (SL), phosphatidylinositol (PI) and phosphatidylinositol mannoside (PIMs) and phospholipids (P) by TLC. Equivalent amounts of apolar as well as polar lipids from both *M. tuberculosis* and MtbΔ*mms* were spotted on TLC plates and analysed for different lipid fractions (Table S1).

TLC analysis of the lipids of *M. tuberculosis* and MtbΔ*mms* exhibited a similar and usual lipid profile with respect to the mycobacterial lipid components. *M. tuberculosis* produces three classes of mycolic acids: alpha-, keto- and methoxy- mycolic acids [33]. Analysis of total mycolic acids extracted from both *M. tuberculosis* and MtbΔ*mms* by single dimension TLC exhibited that there was no significant difference in total or alternate types of mycolic acids (Figure 2A). In addition, we observed similar accumulation of structural variants of DIM and TAGs as described by Giovannini et al [34] (Figure 2B). Two dimensional TLC indicated the equivalent presence of both apolar (DAG, TMM, TDM, SL, GMM, DAT) and polar lipids (PIMs, PI and P) in both *M. tuberculosis* and MtbΔ*mms* as described previously by Bhatt et al [35] (Figure 2C, Figure 2D and Figure 2E). Hence, our observation demonstrated that the lipid profile of *M. tuberculosis* and MtbΔ*mms* was similar with no notable differences.

### MtbΔmms exhibits a severe growth defect in human THP-1 macrophages

Next, we compared the growth characteristics of MtbΔ*mms* and the parental strain in MB7H9 medium and in THP-1 cells. As shown in Figure 3A, we did not observe any difference in

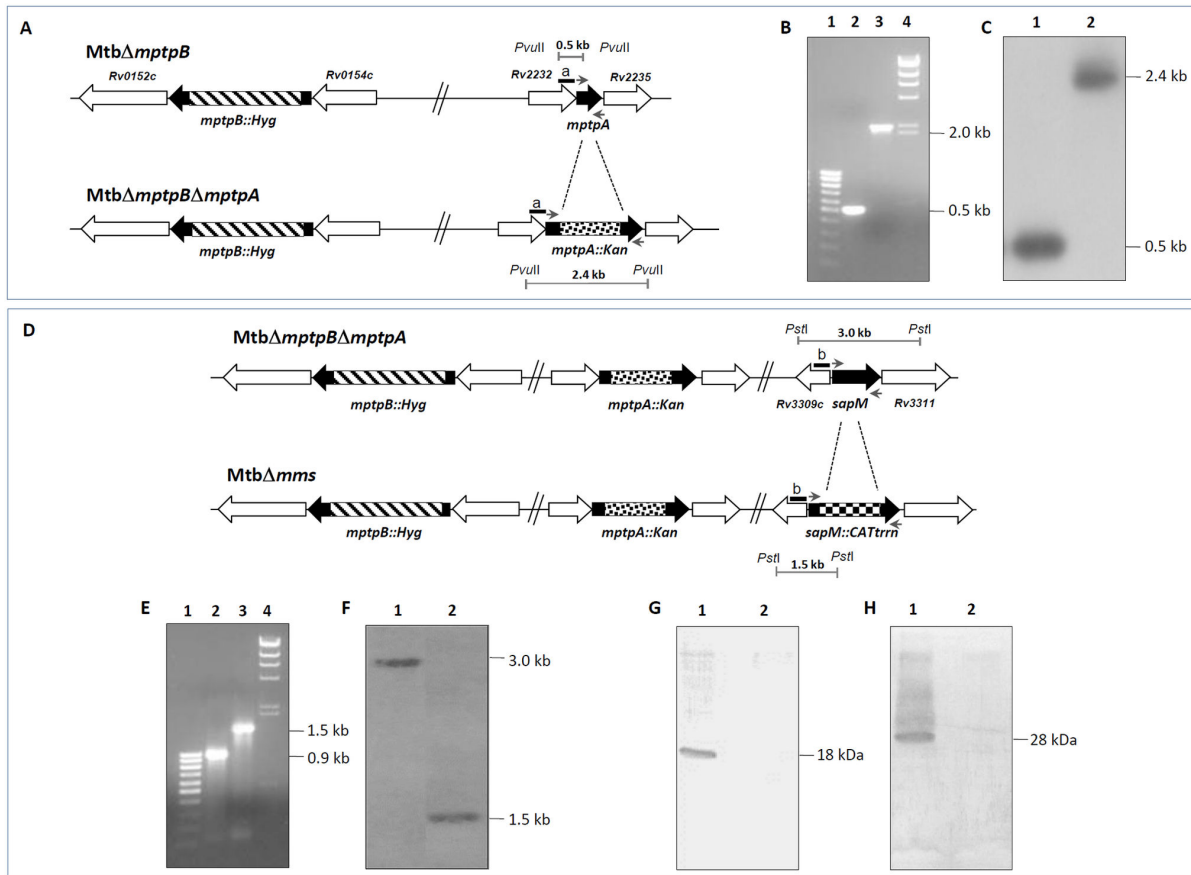

**Figure 1. Construction and characterization of *MtbΔmms*.** (A) Disruption of *mptpA* in *MtbΔmptpB* by homologous recombination. The figure depicts the deletion of *mptpA* by *mptpA::kan* AES to generate *MtbΔmptpBΔmptpA*. Solid bar (a) depicts the region of probe binding for Southern hybridization. *kan*- Kanamycin resistance cassette. (B) Confirmation of disruption of *mptpA* in *MtbΔmptpBΔmptpA* was carried out by PCR by employing *mptpA* gene specific primers. A 0.5 kb amplification product was obtained with *MtbΔmptpB* DNA as template (lane 2) and 2.0 kb amplification product was obtained with *MtbΔmptpBΔmptpA* DNA as template (lane 3). 100 bp ladder (lane 1) and  $\lambda$ HindIII ladder (lane 4). (C) Confirmation of *mptpA* deletion in *MtbΔmptpBΔmptpA* by Southern hybridization. 200 bp at 5' termini of *mptpA* was used as probe (a). Genomic DNA of *MtbΔmptpB* as well as *MtbΔmptpBΔmptpA* was digested with *PvuII*, separated on a 1.0% agarose gel, transferred to nylon membrane and probed with DIG-labeled DNA. The *MtbΔmptpB* strain (lane 1) showed a hybridization signal at 2.4 kb as expected. The presence of 0.5 kb band in the case of *MtbΔmptpBΔmptpA* (lane 2) confirmed that allelic exchange had occurred at the *mptpA* locus. (D) Disruption of *sapM* in *MtbΔmptpBΔmptpA* by homologous recombination. The figure depicts the deletion of *sapM* by *sapM::CATtrn* AES to generate *MtbΔmms*. Solid bar (b) depicts the region of probe binding for Southern hybridization. *CATtrn*-Chloramphenicol resistance cassette. (E) Confirmation of disruption of *sapM* in *MtbΔmms* was carried out by PCR by employing *sapM* gene specific primers. A 0.9 kb amplification product was obtained with *MtbΔmptpBΔmptpA* DNA as template (lane 2) and 1.5 kb amplification product was obtained with *MtbΔmms* mutant DNA as template (lane 3). 100 bp ladder (lane 1) and  $\lambda$ HindIII ladder (lane 4). (F) Confirmation of *sapM* deletion in *MtbΔmms* by Southern hybridization. 200 bp at 5' termini of *sapM* was used as probe (b). Genomic DNA of *MtbΔmptpBΔmptpA* as well as *MtbΔmms* strain was digested with *PstI*, separated on a 1.0% agarose gel, transferred to nylon membrane and probed with DIG-labeled DNA. The *MtbΔmptpBΔmptpA* strain (lane 1) showed a hybridization signal at 3.0 kb as expected. The presence of 1.5 kb band in the case of *MtbΔmms* strain (lane 2) confirmed that allelic exchange had occurred at the *sapM* locus. (G) Confirmation of *mptpA* deletion in *MtbΔmms* by immunoblot analysis. 50  $\mu$ g of culture filtrate proteins of *MtbΔmptpB* (lane 1) and *MtbΔmms* (lane 2) were loaded onto a 12.5% polyacrylamide gel and subjected to electrophoresis. MptpA was detected by immunoblot analysis by using anti-MptpA polyclonal antisera. MptpA protein migrated as an 18 kDa protein band (lane 1). Disruption of *mptpA* in *MtbΔmms* was confirmed by the absence of this 18 kDa band (lane 2). (H) Confirmation of *sapM* deletion in *MtbΔmms* by immunoblot analysis. 50  $\mu$ g of culture filtrate proteins of *MtbΔmptpB* (lane 1) and *MtbΔmms* (lane 2) were loaded onto a 12.5% polyacrylamide gel and subjected to electrophoresis. SapM was detected by immunoblot analysis by using anti-SapM polyclonal antisera. SapM protein migrated as a 28 kDa protein band (lane 1). Disruption of *sapM* in *MtbΔmms* was confirmed by the absence of this 28 kDa band (lane 2).

doi: 10.1371/journal.pone.0077930.g001



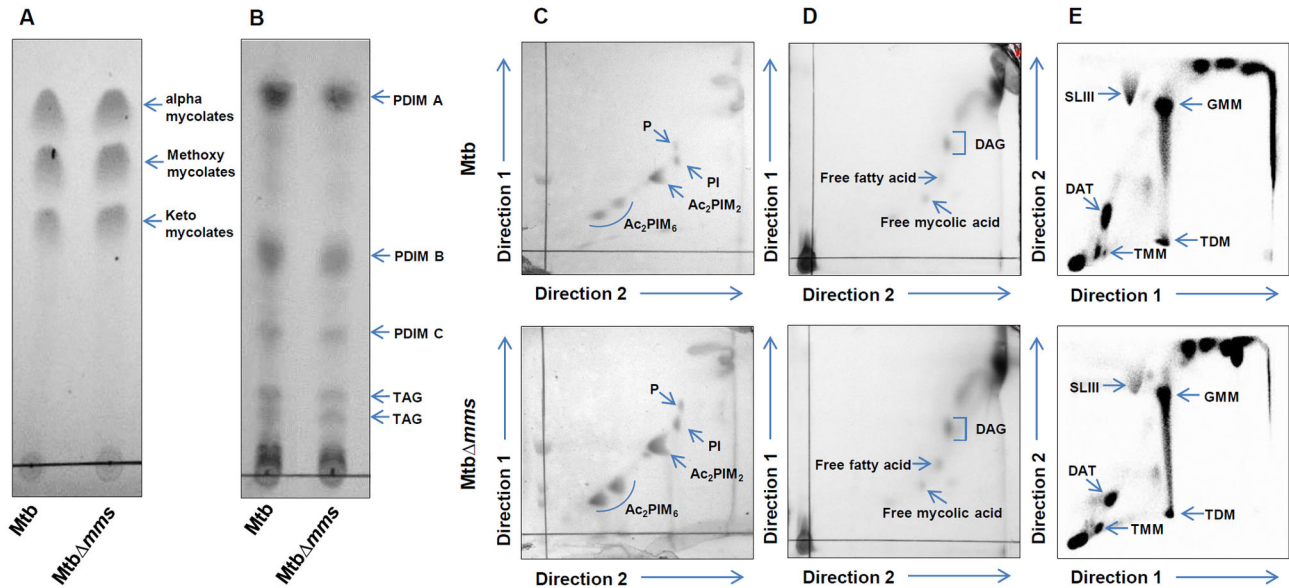

**Figure 2. Lipid analysis of *M.tuberculosis* and *MtbΔmms*.** (A) Total mycolic acids extracts from *M.tuberculosis* (Mtb) and *MtbΔmms* separated by TLC in hexane: ethylacetate (95: 5 v/v) seven times and detected with 20% sulfuric acid in ethanol followed by charring at 100°C. Single dimension TLC depicting alpha-, methoxy- and keto- types of mycolic acids. (B) Apolar lipid extracts from Mtb and *MtbΔmms* separated by TLC in petroleum ether: diethyl ether (90: 10 v/v) and detected with 10% phosphomolybdic acid in ethanol followed by charring at 100°C showing PDIMs and TAG. (C) Lipid extracts from Mtb and *MtbΔmms* separated by two dimensional TLC in chloroform: methanol: water (60: 30: 6 v/v/v) in 1<sup>st</sup> direction and chloroform: acetic acid: methanol: water (40: 25: 3: 6 v/v/v/v) in 2<sup>nd</sup> direction. PIMs, PI and P were detected with 2% orcinol in 10% sulphuric acid followed by charring. (D) Lipid extracts from Mtb and *MtbΔmms* separated by two dimensional TLC in chloroform: methanol (96: 4 v/v) in 1<sup>st</sup> direction and toluene: acetone (80: 20 v/v) in 2<sup>nd</sup> direction. DAG, free fatty acids and free mycolic acids were detected with 10% phosphomolybdic acid in ethanol followed by charring. (E) TLC analysis of lipid extracts from [14C] acetate-labeled bacterial cell of Mtb and *MtbΔmms*. Lipid extracts were dissolved in solvent and run in chloroform: methanol: water (100: 14: 0.8 v/v/v) in 1<sup>st</sup> direction and chloroform: acetone: methanol: water (50: 60: 2.3: 3 v/v/v/v) in 2<sup>nd</sup> direction. GMM, SLIII, DAT, TMM and TDM were visualized with a Typhoon FLA 700 Phosphorimager. PDIM- phthiocerol dimycocerosate, TAG- triacylglycerol, DAG- diacylglycerol, GMM- glucose monomycolate, SL- sulfolipids, DAT- diacyltrehalose, TMM- trehalose monomycolate, TDM- trehalose dimycolate, PIM- phosphatidylinositol mannoside, PI- phosphatidylinositol, P- phospholipids. TLC analysis of the lipids of *M.tuberculosis* and *MtbΔmms* exhibited a similar and usual lipid profile with respect to the mycobacterial lipid components.

doi: 10.1371/journal.pone.0077930.g002

the growth characteristics of *MtbΔmms* and the parental strain in MB7H9, however, a significant difference was observed in the growth kinetics between these two strains in THP-1 macrophages. We observed that *MtbΔmms* displayed a significantly reduced ability (~2.89 fold difference) to infect macrophages in comparison to the parental strain. Moreover, while *M.tuberculosis* continued to grow normally for 6 days, *MtbΔmms* exhibited no sign of growth during this time period demonstrating that the deletion of 3 phosphatases rendered the mutant completely incapable of growing in the macrophages (\*\*\*) ( $p < 0.001$ ) (Figure 3B). These results demonstrate the importance of *mptA*, *mptB* and *sapM* in the growth and survival of *M.tuberculosis* in the human macrophages.

### Deletion of phosphatase genes leads to the attenuation of *M.tuberculosis*

To evaluate whether the deletion of three phosphatases had rendered the *MtbΔmms* mutant sufficiently attenuated for its use as a vaccine, animals were inoculated with either *M.tuberculosis* or BCG or *MtbΔmms* strain (Figure 4A). At 4 weeks post inoculation, we observed the maximum bacillary load of 3.96 log<sub>10</sub> CFU in the lungs of *M.tuberculosis* infected animals, as compared to negligible bacillary load of 0.28 log<sub>10</sub> CFU in the lungs of BCG treated animals. No bacilli were detectable in the lungs of *MtbΔmms* inoculated animals (Figure 4B). However, when the splenic bacillary counts were analyzed, we observed 5.68 log<sub>10</sub> CFU, 0.36 log<sub>10</sub> CFU and 3.99 log<sub>10</sub> CFU in the animals inoculated with *M.tuberculosis*, BCG and *MtbΔmms*, respectively (Figure 4C). Hence, during this initial phase, *MtbΔmms* showed some growth in the spleens of animals, although it was ~70 fold less as compared to the parental strain. At 10 weeks post inoculation, a bacillary

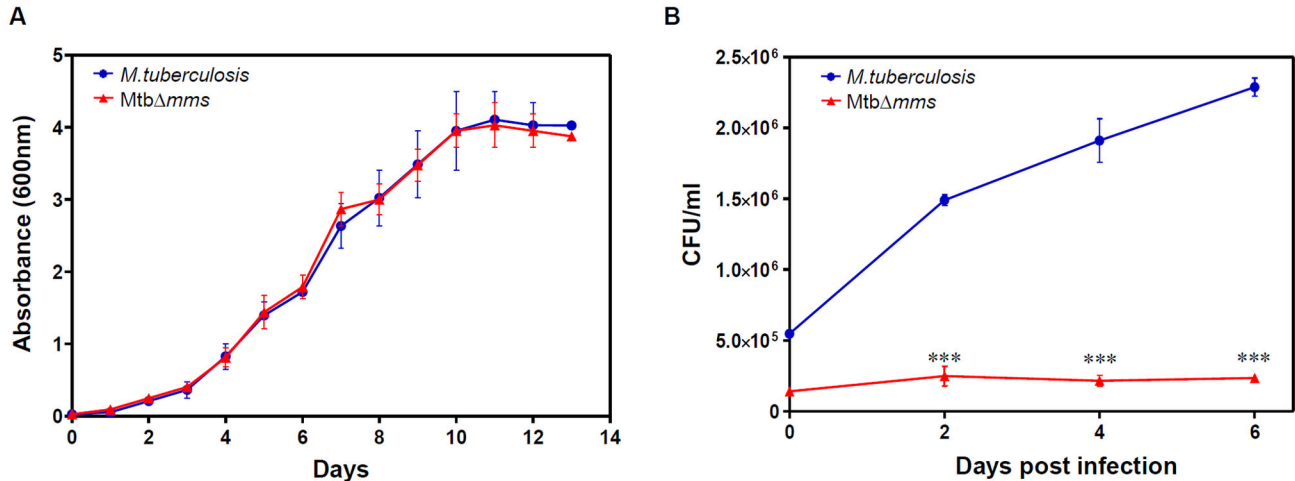

**Figure 3. Influence of deletion of phosphatase genes on the growth and survival of *M. tuberculosis* in vitro.** (A) Growth of *M. tuberculosis* and *MtbΔmms* in broth culture. *M. tuberculosis* and *MtbΔmms* strains were cultured separately in MB7H9 medium at 37°C/200 rpm for 13 days. *M. tuberculosis* and *MtbΔmms* exhibited similar growth pattern in MB7H9 broth culture. (B) Growth of *M. tuberculosis* and *MtbΔmms* in human THP-1 macrophages. THP-1 cells were infected with *M. tuberculosis* or *MtbΔmms* mutant separately at an MOI of 1:1. The number of intracellular viable bacteria was determined for 6 days. The figure represents the CFU data of *M. tuberculosis* and *MtbΔmms* obtained on MB7H11 plates. *MtbΔmms* mutant exhibited a significant attenuation in its growth when compared with *M. tuberculosis*, till 6 days post infection. The experiment was repeated thrice with three independent samples each time. \*\*\* $p < 0.001$  (Two-way ANOVA). The values are represented as the means ( $\pm$ SE).

doi: 10.1371/journal.pone.0077930.g003

load of  $4.69 \log_{10}$  CFU was observed in the lungs of *M. tuberculosis* infected animals. However, at this time point, no bacilli were recovered from the lungs of the animals inoculated with either *MtbΔmms* or BCG (Figure 4D). In spleens, we observed a bacillary count of  $5.45 \log_{10}$  CFU in *M. tuberculosis* infected animals. However, no bacilli were recovered from the spleens of animals inoculated with either *MtbΔmms* or BCG (Figure 4E).

Although, *MtbΔmms* exhibited some growth in the spleens of the inoculated animals, the bacilli were recovered only during the initial phase (4 weeks post inoculation) and the bacillary load was only 1.4% of that observed in the case of *M. tuberculosis* infected animals (70 fold fewer bacilli in *MtbΔmms* inoculated animals). Further, on extending the time post inoculation, no *MtbΔmms* bacilli were recovered in spleens as well as in lungs. Thus, based on these observations, it appeared that as a result of deletion of the phosphatase genes, *MtbΔmms* was sufficiently attenuated for growth in the host tissues and could be safely used as a vaccine candidate.

#### Deletion of phosphatase genes renders *M. tuberculosis* incapable of causing pathology in guinea pigs at 10 weeks post inoculation

The gross pathological changes observed in the organs of the animals at 4 weeks and 10 weeks post inoculation with *MtbΔmms* were commensurate with the bacillary load observed. At 4 weeks post inoculation, the extent of damage observed in the case of *M. tuberculosis* inoculated animals was found to be maximum amongst all the groups with numerous small sized tubercles along with scattered areas of necrosis in

all the organs (score: 2 in lungs and liver and 3 in spleen), indicating progressive pulmonary and extra-pulmonary disease (Figure 5A). However, in the case of BCG inoculation, no pathology was observed in the lungs, liver or spleen as expected (score: 1 in all the organs). In the case of inoculation with *MtbΔmms*, most of the animals displayed negligible lung and hepatic pathology (score: 1) with predominantly scanty and extremely small necrotic lesions. However, in the case of spleen, *MtbΔmms* inoculated animals were allotted intermediate score (score: 2) in comparison to other two groups. This indicated that *MtbΔmms* inoculation resulted in some pathological damage to spleens, although, the damage was considerably less in comparison to the *M. tuberculosis* infected animals (Figure 5A). When the animals were evaluated at 10 weeks post inoculation, in the case of *M. tuberculosis* infected animals, as expected, the extent of damage was more than that observed at 4 weeks (score: 3 in lungs, 4 in liver and 3-4 in spleen) with extensive involvement and numerous large sized tubercles effacing the entire organs (Figure 6A). However, the animals inoculated with either BCG or *MtbΔmms* displayed normal lungs, liver and spleen phenotype (score: 1) with no pathological damage (Figure 6A).

To evaluate the histopathological changes in the lungs and liver of guinea pigs inoculated with *M. tuberculosis*, BCG or *MtbΔmms*, the tissue sections were stained with haematoxylin and eosin. At 4 weeks post inoculation, the lungs of *M. tuberculosis* infected animals exhibited granulomatous infiltration with caseating necrotic granulomas effacing the pulmonary parenchyma (Figure 5B). Inoculation with either BCG or *MtbΔmms* resulted in a negligible granulomatous



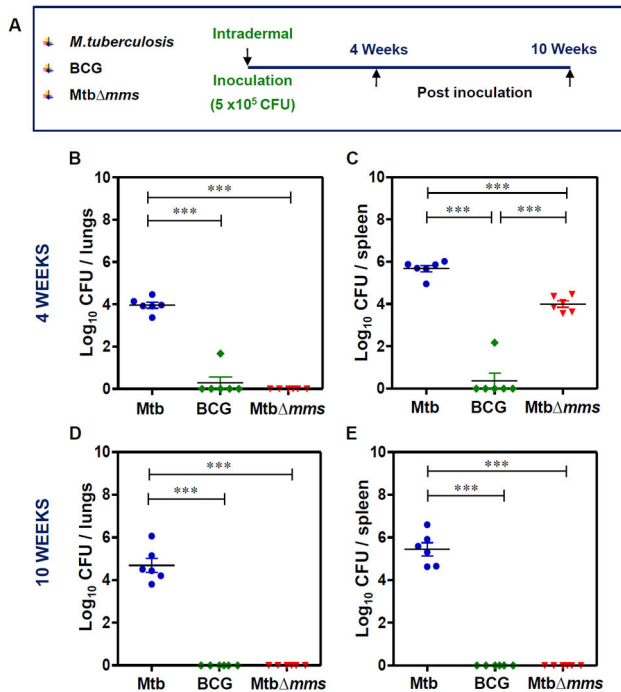

**Figure 4. Bacillary load in the organs of guinea pigs post inoculation with various strains.** (A) Experimental protocol for evaluating the attenuation of *MtbΔmms*. (B, C) Bacillary load in the lungs and spleens of guinea pigs inoculated with *M.tuberculosis* (Mtb), BCG or *MtbΔmms* at 4 weeks post inoculation. (D, E) Bacillary load in the lungs and spleens of guinea pigs inoculated with Mtb, BCG or *MtbΔmms* at 10 weeks post inoculation. At 10 weeks post inoculation, no bacterial colony was obtained from the lung and spleen homogenates of BCG or *MtbΔmms* inoculated animals on MB7H11 agar. Each data point represents the Log<sub>10</sub> CFU value for an individual animal (n=6) and the bar depicts mean (±SE) for each group. \*\*\*p<0.001 (One way ANOVA).

doi: 10.1371/journal.pone.0077930.g004

infiltration in lungs when compared with *M.tuberculosis* infected animals. Liver of *M.tuberculosis* infected animals displayed moderate involvement of tissues with few granulomatous lesions. However, BCG or *MtbΔmms* inoculated animals exhibited a normal hepatic tissue organization with clearly visible portal triad (Figure 5B). At 10 weeks post inoculation, the lungs of *M.tuberculosis* infected animals exhibited advanced stage granuloma with extensive coalescence of multiple granulomas. The lung granulomas were characterized by extensive necrosis resulting in the loss of lung micro-architecture (Figure 6B). However, in the case of inoculation with either BCG or *MtbΔmms*, the alveolar and bronchiolar structures of the lungs were well preserved with no sign of active disease. Liver of *M.tuberculosis* infected animals exhibited extensive pathological damage with multiple coalescing granulomas effacing the entire hepatic tissues, whereas BCG or *MtbΔmms* inoculated animals exhibited

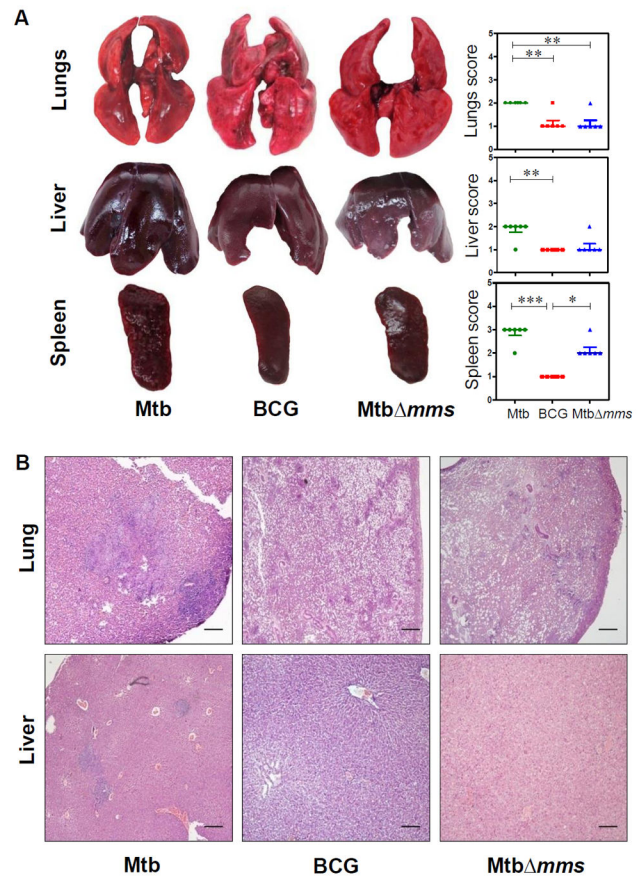

**Figure 5. Gross pathology and histopathology of guinea pig organs inoculated with various strains at 4 weeks.** (A) Representative photographs of lungs, liver and spleen of individual animal (n=6) euthanized at 4 weeks post inoculation with either *M.tuberculosis* (Mtb), BCG or *MtbΔmms*. The graphical representation of gross scores of various organs is also shown alongside. The bar depicts median for each group. \*p<0.05; \*\*p<0.01 and \*\*\*p<0.001 (Kruskal Wallis test). (B) The representative photomicrographs of the lung and liver tissues stained with Haematoxylin-Eosin staining (H&E). The figure depicts 20x magnification of representative photomicrographs of the organs of animals inoculated with either Mtb, BCG or *MtbΔmms* euthanized at 4 weeks post inoculation. The scale bars depict 500 μm for the lung as well as liver sections. *MtbΔmms* inoculated animals displayed negligible lung and hepatic pathology. However, in the case of spleens, *MtbΔmms* inoculation resulted in some pathological damage, although, the damage was considerably less in comparison to the *M.tuberculosis* infected animals.

doi: 10.1371/journal.pone.0077930.g005

normal hepatic tissue organization with clearly visible hepatic lobules (Figure 6B).

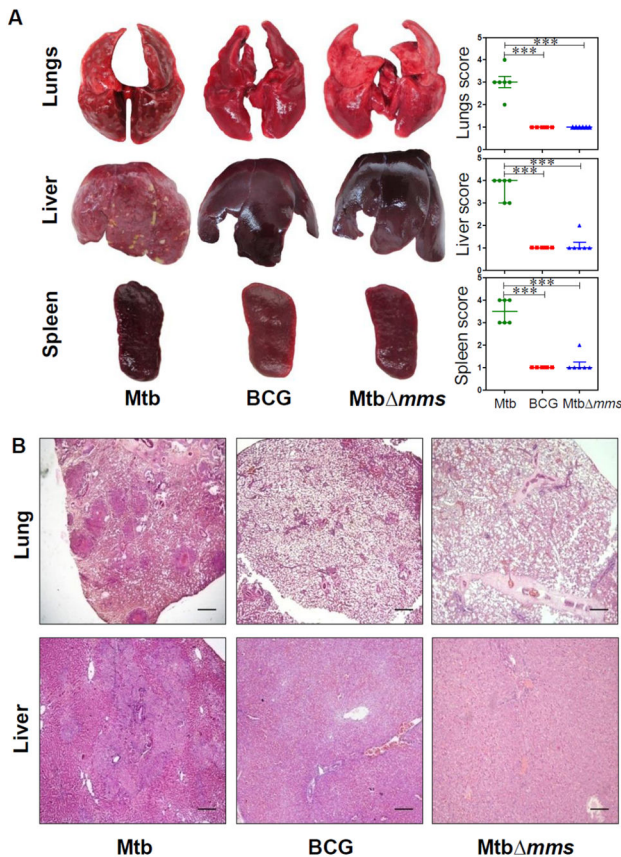

**Figure 6. Gross pathology and histopathology of guinea pig organs inoculated with various strains at 10 weeks.** (A) Representative photographs of lungs, liver and spleen of individual animal (n=6) euthanized at 10 weeks post inoculation with either *M.tuberculosis* (Mtb), BCG or Mtb $\Delta$ mms. The graphical representation of gross scores of various organs is also shown alongside. The bar depicts median for each group.  $***p<0.001$  (Kruskal Wallis test). (B) The representative photomicrographs of the lung and liver tissues stained with Haematoxylin-Eosin staining (H&E). The figure depicts 20x magnification of representative photomicrographs of the organs of animals inoculated with either Mtb, BCG or Mtb $\Delta$ mms euthanized at 10 weeks post inoculation. The scale bars depict 500  $\mu$ m for the lung as well as liver sections. Mtb $\Delta$ mms inoculated animals displayed complete restoration of pulmonary and hepatic parenchyma with negligible pathological damage to the tissues at 10 weeks post inoculation.

doi: 10.1371/journal.pone.0077930.g006

### Mtb $\Delta$ mms vaccination limits *M.tuberculosis* multiplication in the lungs of guinea pigs

As the Mtb $\Delta$ mms mutant appeared to be safe for its use as a vaccine candidate, we next evaluated its protective efficacy against *M.tuberculosis* challenge. For this, guinea pigs were vaccinated with either BCG or Mtb $\Delta$ mms and were infected with 10-30 *M.tuberculosis* bacilli by aerosol route at 12 weeks post vaccination. As a control, one group of guinea pigs was sham immunized. Following 4 and 12 weeks after challenge,

animals were euthanized and bacillary load in the lungs and spleens was determined (Figure 7A). At 4 weeks after challenge, the sham immunized animals exhibited 6.30 log<sub>10</sub> CFU in lungs. The BCG vaccinated animals exhibited a significantly reduced CFU in lungs (4.43 log<sub>10</sub> CFU) indicating 1.87 log<sub>10</sub> CFU reduction ( $*p<0.05$ ) as compared to the sham-immunized animals (Figure 7B). Mtb $\Delta$ mms vaccinated animals exhibited a bacillary load of only 3.60 log<sub>10</sub> CFU in lungs indicating that the mutant also significantly reduced the pulmonary load by 2.70 log<sub>10</sub> CFU ( $***p<0.001$ ) in comparison to the sham immunized animals (Figure 7B). Further, the sham immunized animals exhibited a splenic bacillary load of 5.37 log<sub>10</sub> CFU (Figure 7C), while, the BCG vaccinated animals exhibited a splenic bacillary load of only 1.62 log<sub>10</sub> CFU. This significant reduction in splenic bacillary load by 3.75 log<sub>10</sub> CFU ( $***p<0.001$ ) demonstrated a tight control of hematogenous spread of bacilli by BCG. The splenic bacillary load in the case of Mtb $\Delta$ mms vaccinated animals (4.73 log<sub>10</sub> CFU) was 0.64 log<sub>10</sub> CFU less when compared with the sham immunized animals but the difference was not significant (Figure 7C).

On extending the time period between challenge and euthanasia to 12 weeks, the sham immunized animals exhibited a bacillary load of 6.15 log<sub>10</sub> CFU in lungs (Figure 7D). Immunization with BCG resulted in 4.57 log<sub>10</sub> CFU in lungs as compared to the sham immunized animals, however, the difference in the pulmonary bacillary load between BCG and sham immunized animals was statistically not significant and with the extension of time, the ability of BCG to impede bacillary multiplication met with a considerable decline. In contrast, Mtb $\Delta$ mms vaccinated animals exhibited only 3.16 log<sub>10</sub> CFU in lungs, thus indicating a significantly reduced bacillary load by 2.99 log<sub>10</sub> CFU ( $*p<0.05$ ) in comparison to the sham immunized animals. These observations demonstrated that Mtb $\Delta$ mms exhibited a more sustainable and superior protection as compared to BCG. The splenic bacillary load in the case of sham immunized animals was 4.92 log<sub>10</sub> CFU (Figure 7E). Although, the splenic bacillary loads in the cases of BCG vaccination and Mtb $\Delta$ mms vaccination were 3.30 log<sub>10</sub> CFU and 4.21 log<sub>10</sub> CFU, respectively, these were not significantly different in comparison to the splenic bacillary load observed in the sham immunized animals. Thus, our observations indicated that Mtb $\Delta$ mms was not able to exhibit a significant control on the hematogenous spread at either 4 weeks or 12 weeks after challenge.

### Mtb $\Delta$ mms vaccination imparts protection from pathological damage in lungs

At 4 weeks after challenge, the sham immunized animals exhibited severe pathology in lungs characterized by the presence of numerous large and small sized tubercles (score: 4 in lungs). However, hepatic and splenic tissues exhibited moderate involvement (score: 2 in liver and 2-3 in spleen) (Figure 8A). In contrast, BCG vaccinated animals displayed significantly reduced gross lesions in the organs when compared with the unvaccinated animals (score: 2 in lungs and 1 in liver and spleen). In the case of immunization with Mtb $\Delta$ mms, the animals exhibited moderately inflamed lungs

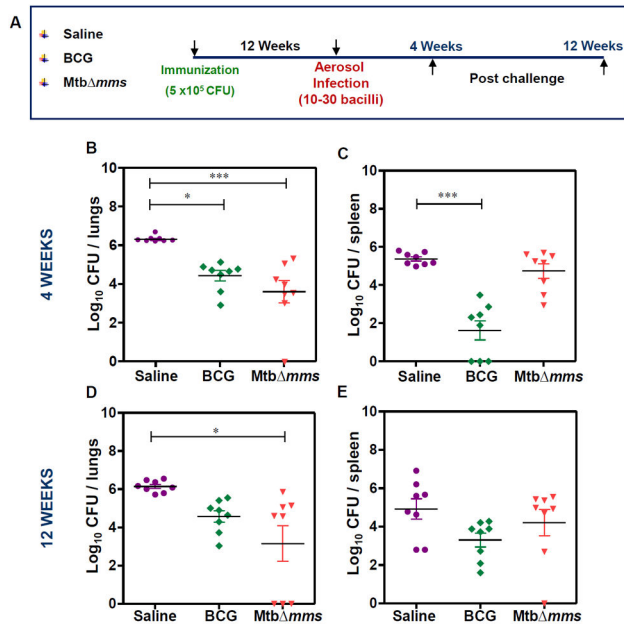

**Figure 7. Determination of bacillary load in guinea pig organs after immunization with various strains.** (A) Experimental protocol for evaluating the protective efficacy of *MtbΔmms* against *M.tuberculosis* infection. (B, C) The bacillary load in the lungs and spleens of guinea pigs (n=8) vaccinated with BCG, *MtbΔmms* or saline at 4 weeks after *M.tuberculosis* challenge. (D, E) The bacillary load in the lungs and spleens of guinea pigs (n=8) vaccinated with BCG, *MtbΔmms* or saline at 12 weeks after challenge. *MtbΔmms* imparted a significant protection as compared to the sham immunized animals in the lungs of vaccinated animals. Each data point represents the  $\text{Log}_{10}$  CFU value for an individual animal and the bar depicts mean ( $\pm$ SE) for each group. \* $p < 0.05$  and \*\*\* $p < 0.001$  (One-way ANOVA).

doi: 10.1371/journal.pone.0077930.g007

and spleen (score: 2 in both the organs) with minimal hepatic tissue destruction (score: 1) (Figure 8A). On extending the period between challenge and euthanasia to 12 weeks, we observed an overall increase in the gross pathological damage to the organs of sham immunized animals as characterized by extensive involvement of tissue with numerous large tubercles and scattered areas of necrosis in both lungs and liver (score: 3-4). In addition, a marked discoloration of spleen with numerous large and small sized tubercles and occasional attrition of capsular structure was also observed in most of the sham immunized animals (score: 4) (Figure 9A). BCG immunized guinea pigs exhibited moderate involvement of lung and splenic tissues with small sized tubercles effacing the entire tissues (score: 2-3 in lungs and 1-2 in spleen). However, liver of these animals exhibited normal architecture (score: 1). In case of immunization with *MtbΔmms*, the animals exhibited a lung phenotype similar to BCG immunized animals (score: 2-3). However, in the case of spleen and liver, vaccination with *MtbΔmms* resulted in an enhanced pathology when compared

with the BCG vaccination (score: 2-3 in spleen and 3-4 in liver) (Figure 9A).

Histopathological analyses of lung and liver sections further substantiated the gross pathological observations. At 4 weeks after challenge, sham immunized animals exhibited several discrete necrotic tubercles occupying 30-40% of the lung sections (Figure 8B). Vaccination with BCG or *MtbΔmms* prevented pulmonary damage as was evident from the presence of only a moderate granulomatous infiltration and well preserved alveolar spaces, when compared with the sham immunized animals. Sham immunized animals displayed inflammation of hepatic tissues with scattered areas of cellular infiltration. BCG vaccinated animals exhibited minimal involvement of hepatic tissues; however, *MtbΔmms* immunized guinea pigs exhibited moderate involvement with granulomatous infiltration (Figure 8B). Further, at 12 weeks after challenge, as expected, lungs of the sham immunized animals exhibited extensive granulomatous infiltration with multi-focal coalescing granulomas along with prominent central coagulative necrosis (Figure 9B). BCG immunized animals exhibited the presence of scattered areas of inflammation with discrete granulomas along with necrotic centre in lungs. *MtbΔmms* vaccinated animals exhibited moderate inflammation in lungs similar to BCG vaccinated animals. On comparing the pathological changes in liver (Figure 9B), sham immunized animals exhibited effacement of a large proportion of hepatic parenchyma due to multiple coalescing foci of necrotic granulomas. Immunization with BCG resulted in a significant reduction in hepatic damage with only a negligible granulomatous infiltration. However, in the case of *MtbΔmms* immunization, the hepatic lobules displayed an extensive granulomatous infiltration (Figure 9B).

## Discussion

The development and widespread administration of the BCG vaccine since the early 1920s was originally hailed as a major breakthrough with the promise to eradicate the scourge of TB from the world. However, the early promise was not realized and with the growing incidence of TB cases and inconsistent protective efficacy of BCG, it became evident that the BCG vaccine, in its existing form is of limited use in controlling the disease particularly in the elderly [36]. The availability of complete *M.tuberculosis* genome sequence and an increased understanding of the genes involved in *M.tuberculosis* virulence and immune responses has led to a renewed optimism that it should be possible to develop more efficient TB vaccines than the existing BCG [37,38].

In this study, we have developed a multigene mutant of *M.tuberculosis*, having deletions in three genes namely, *mptpA*, *mptpB* and *sapM* that are involved in host-pathogen interaction and signal transduction. *M.tuberculosis* Erdman and *M.tuberculosis* H37Rv have been commonly used as basis for generating attenuated strains of *M.tuberculosis* [39-44]. However, to ensure that their virulence was not diminished on account of repeated *in vitro* subculturing, the bacilli recovered from the organs of infected animals were subcultured only once



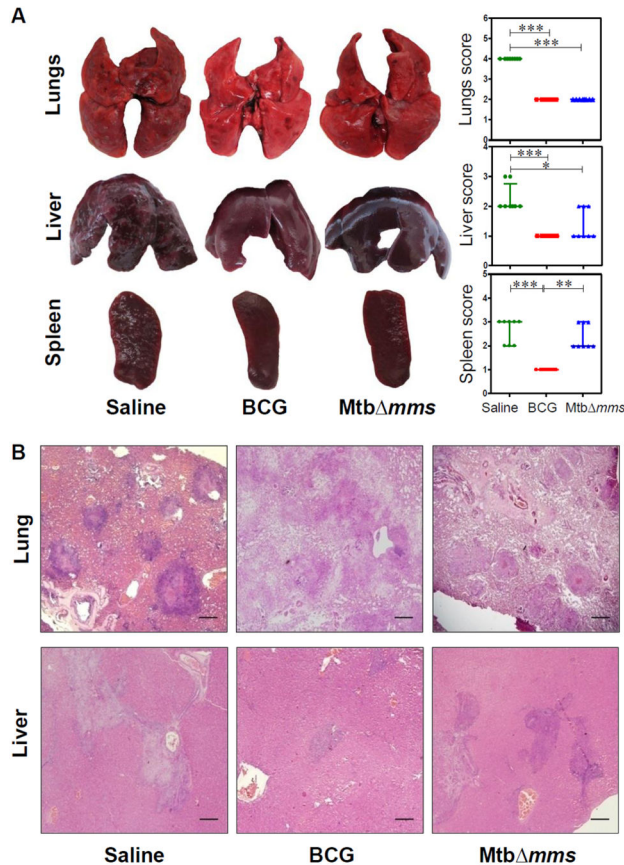

**Figure 8. Gross pathology and histopathology of vaccinated guinea pig organs at 4 weeks after challenge.** (A) Representative photographs of lungs, liver and spleen of individual animal (n=8) vaccinated with either BCG, MtbΔmms or saline and euthanized at 4 weeks after challenge. The graphical representation of gross scores of various organs is also shown alongside. The bar depicts median for each group. \*p<0.05; \*\*p<0.01 and \*\*\*p<0.001 (Kruskal Wallis test). (B) The representative photomicrographs of the lung and liver tissues stained with Haematoxylin-Eosin staining (H&E). The figure depicts 20x magnification of representative photomicrographs of organs of the animals vaccinated with either BCG, MtbΔmms or saline and euthanized at 4 weeks after challenge. The scale bars depict 500 μm for lung as well as liver sections. Unvaccinated animals show severe pathology in lungs characterized by the presence of numerous large and small sized tubercles. However, hepatic and splenic tissues show moderate involvement. In the case of immunization with MtbΔmms, the animals show moderately inflamed lungs with minimal hepatic tissue destruction similar to that observed in the case of BCG vaccination. However, spleens of MtbΔmms vaccinated animals exhibit pathological damage similar to sham immunized animals.

doi: 10.1371/journal.pone.0077930.g008

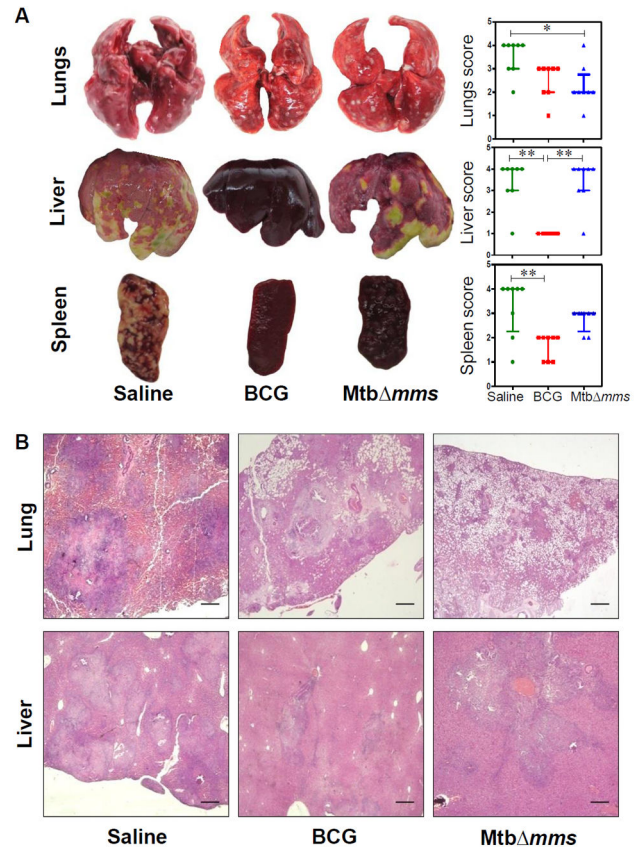

**Figure 9. Gross pathology and histopathology of vaccinated guinea pig organs at 12 weeks after challenge.** (A) Representative photographs of lungs, liver and spleen of individual animal (n=8) vaccinated with either BCG, MtbΔmms or saline and euthanized at 12 weeks after challenge. The graphical representation of gross scores of various organs is also shown alongside. The bar depicts median for each group. \*p<0.05 and \*\*p<0.01 (Kruskal Wallis test). (B) The representative photomicrographs of the lung and liver tissues stained with Haematoxylin-Eosin staining (H&E). The figure depicts 20x magnification of representative photomicrographs of organs of the animals vaccinated with either BCG, MtbΔmms or saline and euthanized at 12 weeks after challenge. The scale bars depict 500 μm for lung as well as liver sections. Unvaccinated animals show characteristic presence of multiple coalescing granulomas with necrosis in both lungs and liver. In addition, the animals show a marked discoloration of spleen with numerous large and small sized tubercles. MtbΔmms immunized animals, on the other hand show reduced granulomatous infiltration with only a few small and discrete granulomas in lungs. However, liver and spleen of MtbΔmms vaccinated animals exhibit pathological damage similar to sham immunized animals.

doi: 10.1371/journal.pone.0077930.g009

for their use for generating mutants or for challenging the animals.

We have evaluated the vaccine efficacy of the resulting mutant against *M.tuberculosis* challenge in guinea pigs. To ensure that the mutated genes were essential only for the growth of the pathogen in the host and not in the broth culture, we selected the genes implicated in the host-pathogen interaction. As expected, *MtbΔmms* grew in broth culture similar to the parental strain, however, it displayed a significantly reduced ability to infect and grow inside the human THP-1 macrophages emphasizing that the phosphatases are vital for the growth of the pathogen in macrophages.

In addition, our studies in guinea pigs also provide evidence that *MtbΔmms* is highly attenuated for its growth and ability to cause pathology in the host. On inoculation of guinea pigs with *MtbΔmms*, no bacilli were recovered from the lungs of the animals at any time point of the study. From the spleens of these animals, bacilli were recovered during early phases after the inoculation (4 weeks) but no bacilli were recovered after this initial period. This demonstrated that *MtbΔmms* could survive only for a short while; therefore, at 10 weeks post inoculation, the organs of *MtbΔmms* as well as BCG inoculated animals appeared to be similar with no apparent damage indicating that the mutant was safe to be used as a vaccine candidate.

For the evaluation of protective efficacy, we employed guinea pig model of experimental tuberculosis. The guinea pig model of low dose aerogenic infection with virulent *M.tuberculosis* has been preferentially used to elucidate the events in the pathogenesis of pulmonary tuberculosis [45]. Guinea pigs are more susceptible to tuberculosis infection and have the advantage over mice in that the pathology of the disease in this model is closer to human tuberculosis. Thus, it serves as an effective model to evaluate vaccine efficacy. When guinea pigs are infected with less than 10 CFU of virulent *M.tuberculosis*, it has been observed that the pathogen disseminates from lungs to the pulmonary lymph nodes via hematogenous spread and then appears in spleens within ~3 weeks post infection [46,47]. Bacilli reseed the lung by ~4 weeks to form secondary granulomas. The protective efficacy of *MtbΔmms* was evaluated based on its ability to reduce the bacillary load in lungs and spleens of guinea pigs post *M.tuberculosis* infection as well as to control the pathological damage.

Our study shows that *MtbΔmms* vaccination was able to restrict bacterial multiplication at the primary site of infection leading to reduction in the pulmonary bacillary load and this bacillary load reduction by *MtbΔmms* as well as by BCG was comparable during early phase (4 weeks) after infection. Unlike in the case of BCG vaccination, however, *MtbΔmms* was not able to control hematogenous spread. A number of studies have reported the examples of vaccines which fail to provide consistent protection in all the organs uniformly [12,48,49]. For example, it has been reported that a recombinant BCG expressing ESAT-6 provided significant protection in both mice and guinea pigs against dissemination at extra-pulmonary site but failed to protect against pulmonary form of the disease [49]. On the other hand, vaccination of guinea pigs with DNA

encoding the mycobacterial antigen MPB83 influenced the pulmonary pathology but not the hematogenous spread following the aerogenic infection with *Mycobacterium bovis* [48]. Also, in the case of vaccination of guinea pigs with the  $\Delta phoP$  mutant, a significant reduction in the bacillary load in lungs but not in the spleens was observed as compared to the unvaccinated animals [12].

On extending the period between the *M.tuberculosis* challenge and euthanasia to 12 weeks, although BCG appeared to lose the control of bacillary multiplication in the pulmonary tissue, *MtbΔmms* was still very effective in controlling the lung infection. At this time point, however, neither BCG nor *MtbΔmms* exhibited any significant control over the hematogenous spread. The pathological damage in the animals from various groups corroborated the CFU data. From this, we could infer that *MtbΔmms* imparted as much or better control of the disease than BCG at the pulmonary site. However, immunization with the phosphatase mutant did not show any superior control over the bacillary multiplication in spleens, when compared with the sham immunized animals.

As phosphatases play an important role in the lipid metabolism, we evaluated the lipid profiles of *M.tuberculosis* and *MtbΔmms* to ascertain whether disruption of phosphatase genes might result in the altered lipid profile in *MtbΔmms*. However, our observations demonstrated that the lipid profiles of both the strains were identical inspite of disruption of phosphatase genes in *MtbΔmms* indicating thereby that the phenotype of the mutant was ascribed to the loss of phosphatase genes and the influence was not related to any alteration in the lipid composition.

To summarize, we demonstrate that mutation of genes encoding the signal transduction associated phosphatases of *M.tuberculosis* provides optimism for the generation of novel potential vaccine candidates against tuberculosis. The *MtbΔmms* was not only significantly attenuated for growth in macrophages and guinea pigs, it also imparted an enhanced protection against pulmonary TB. However, further modifications would be required in order for *MtbΔmms* to elicit more appropriate immune responses for imparting superior protection including the control of hematogenous spread. Moreover, due to increasing concern about the emergence of antibiotic resistance in human pathogens, use of antibiotic-resistant genes in recombinant vaccines meant for use in humans is not permissible [50]. Hence, the antibiotic resistance genes from *MtbΔmms* would have to be removed before any possibility of its use in human clinical trials. Our future efforts would focus on addressing these issues.

## Supporting Information

**Table S1. Solvent systems employed for lipid analyses.**  
(DOC)

## Acknowledgements

We acknowledge Dr. Garima Khare for critical reading of the manuscript. Rupangi Verma Puri is acknowledged for her help with the macrophage experiment. We thank Dr. Ruchi Jain and



Dr. Bappaditya Dey for useful discussions during the designing of the animal experiments and writing of this manuscript. Stuti Sharma and Dr. Garima Khare are acknowledged for purifying SapM and raising antibodies. Anti-mptpA antibody was provided by Dr. Yogendra Singh, IGIB, New Delhi. Sandeep Kumar is acknowledged for his help with the animal experiments. Priti Singh and Tannupriya Gosain are acknowledged for technical assistance. Bahadur Singh, Devender Singh and Jeevan Rawat are acknowledged for looking after the animals and cleaning of the glasswares etc.

## References

- Walker KB, Brennan MJ, Ho MM, Eskola J, Thiry G et al. (2010) The second Geneva Consensus: Recommendations for novel live TB vaccines. *Vaccine* 28: 2259-2270. doi:10.1016/j.vaccine.2009.12.083. PubMed: 20074686.
- WHO (2012) Global tuberculosis report. Retrieved on published at whilst December year 1111 from [http://www.who.int/tb/publications/global\\_report/gtbr12\\_mainpdf](http://www.who.int/tb/publications/global_report/gtbr12_mainpdf). Accessed 31<sup>st</sup> August 2013.
- Gandhi NR, Nunn P, Dheda K, Schaaf HS, Zignol M et al. (2010) Multidrug-resistant and extensively drug-resistant tuberculosis: a threat to global control of tuberculosis. *Lancet* 375: 1830-1843. doi:10.1016/S0140-6736(10)60410-2. PubMed: 20488523.
- Velayati AA, Masjedi MR, Farnia P, Tabarsi P, Ghanavi J et al. (2009) Emergence of new forms of totally drug-resistant tuberculosis bacilli: super extensively drug-resistant tuberculosis or totally drug-resistant strains in Iran. *Chest* 136: 420-425. doi:10.1378/chest.08-2427. PubMed: 19349380.
- McShane H (2011) Tuberculosis vaccines: beyond bacille Calmette-Guerin. *Philos Trans R Soc Lond B Biol Sci* 366: 2782-2789. doi: 10.1098/rstb.2011.0097. PubMed: 21893541.
- Brodin P, Majlessi L, Brosch R, Smith D, Bancroft G et al. (2004) Enhanced protection against tuberculosis by vaccination with recombinant *Mycobacterium microti* vaccine that induces T cell immunity against region of difference 1 antigens. *J Infect Dis* 190: 115-122. doi:10.1086/421468. PubMed: 15195250.
- Brosch R, Gordon SV, Garnier T, Eiglmeier K, Frigui W et al. (2007) Genome plasticity of BCG and impact on vaccine efficacy. *Proc Natl Acad Sci U S A* 104: 5596-5601. doi:10.1073/pnas.0700869104. PubMed: 17372194.
- Behr MA, Wilson MA, Gill WP, Salamon H, Schoolnik GK et al. (1999) Comparative genomics of BCG vaccines by whole-genome DNA microarray. *Science* 284: 1520-1523. doi:10.1126/science.284.5419.1520. PubMed: 10348738.
- Hernández Pando R, Aguilar LD, Infante E, Cataldi A, Bigi F et al. (2006) The use of mutant mycobacteria as new vaccines to prevent tuberculosis. *Tuberculosis* 86: 203-210. doi:10.1016/j.tube.2006.01.022. PubMed: 16542875.
- Sambandamurthy VK, Jacobs WR Jr. (2005) Live attenuated mutants of *Mycobacterium tuberculosis* as candidate vaccines against tuberculosis. *Microbes Infect* 7: 955-961. doi:10.1016/j.micinf.2005.04.001. PubMed: 15914065.
- Hinchey J, Lee S, Jeon BY, Basaraba RJ, Venkataswamy MM et al. (2007) Enhanced priming of adaptive immunity by a proapoptotic mutant of *Mycobacterium tuberculosis*. *J Clin Invest* 117: 2279-2288. doi:10.1172/JCI31947. PubMed: 17671656.
- Martin C, Williams A, Hernandez-Pando R, Cardona PJ, Gormley E et al. (2006) The live *Mycobacterium tuberculosis* *phoP* mutant strain is more attenuated than BCG and confers protective immunity against tuberculosis in mice and guinea pigs. *Vaccine* 24: 3408-3419. doi: 10.1016/j.vaccine.2006.03.017. PubMed: 16564606.
- Ottenhoff TH, Kaufmann SH (2012) Vaccines against tuberculosis: where are we and where do we need to go? *PLOS Pathog* 8: e1002607. PubMed: 22589713.
- Sambandamurthy VK, Derrick SC, Hsu T, Chen B, Larsen MH et al. (2006) *Mycobacterium tuberculosis*  $\Delta$ RD1  $\Delta$ panCD: a safe and limited replicating mutant strain that protects immunocompetent and immunocompromised mice against experimental tuberculosis. *Vaccine* 24: 6309-6320. doi:10.1016/j.vaccine.2006.05.097. PubMed: 16860907.
- Waters WR, Palmer MV, Nonnecke BJ, Thacker TC, Scherer CF et al. (2007) Failure of a *Mycobacterium tuberculosis*  $\Delta$ RD1  $\Delta$ panCD double deletion mutant in a neonatal calf aerosol *M. bovis* challenge model: comparisons to responses elicited by *M. bovis* bacille Calmette-Guerin. *Vaccine* 25: 7832-7840. doi:10.1016/j.vaccine.2007.08.029. PubMed: 17931755.
- Tuberculosis Vaccine candidates (2011). Retrieved on published at whilst December year 1111 from [http://www.stoptb.org/wg/new\\_vaccines/assets/documents/TB%20Vaccine%20Pipeline\\_rAug%202012.pdf](http://www.stoptb.org/wg/new_vaccines/assets/documents/TB%20Vaccine%20Pipeline_rAug%202012.pdf). Accessed 31<sup>st</sup> August 2013.
- Beresford NJ, Mulhearn D, Szczepankiewicz B, Liu G, Johnson ME et al. (2009) Inhibition of MptpB phosphatase from *Mycobacterium tuberculosis* impairs mycobacterial survival in macrophages. *J Antimicrob Chemother* 63: 928-936. doi:10.1093/jac/dkp031. PubMed: 19240079.
- Saleh MT, Belisle JT (2000) Secretion of an acid phosphatase (SapM) by *Mycobacterium tuberculosis* that is similar to eukaryotic acid phosphatases. *J Bacteriol* 182: 6850-6853. doi:10.1128/JB.182.23.6850-6853.2000. PubMed: 11073936.
- Vergne I, Chua J, Lee HH, Lucas M, Belisle J et al. (2005) Mechanism of phagolysosome biogenesis block by viable *Mycobacterium tuberculosis*. *Proc Natl Acad Sci U S A* 102: 4033-4038. doi:10.1073/pnas.0409716102. PubMed: 15753315.
- Wong D, Chao JD, Av-Gay Y (2013) *Mycobacterium tuberculosis*-secreted phosphatases: from pathogenesis to targets for TB drug development. *Trends Microbiol* 21: 100-109. doi:10.1016/j.tim.2012.09.002. PubMed: 23084287.
- Festjens N, Bogaert P, Batni A, Houthuys E, Plets E et al. (2011) Disruption of the SapM locus in *Mycobacterium bovis* BCG improves its protective efficacy as a vaccine against *M. tuberculosis*. *EMBO. Mol Med* 3: 222-234.
- Saikolappan S, Estrella J, Sasindran SJ, Khan A, Armitige LY et al. (2012) The *fbpA/sapM* double knock out strain of *Mycobacterium tuberculosis* is highly attenuated and immunogenic in macrophages. *PLOS ONE* 7: e36198. doi:10.1371/journal.pone.0036198. PubMed: 22574140.
- Wong D, Bach H, Sun J, Hmama Z, Av-Gay Y (2011) *Mycobacterium tuberculosis* protein tyrosine phosphatase (PtpA) excludes host vacuolar-H<sup>+</sup>-ATPase to inhibit phagosome acidification. *Proc Natl Acad Sci U S A* 108: 19371-19376. doi:10.1073/pnas.1109201108. PubMed: 22087003.
- Bach H, Papavinasandaram KG, Wong D, Hmama Z, Av-Gay Y (2008) *Mycobacterium tuberculosis* virulence is mediated by PtpA dephosphorylation of human vacuolar protein sorting 33B. *Cell Host Microbe* 3: 316-322. doi:10.1016/j.chom.2008.03.008. PubMed: 18474358.
- Koul A, Choidas A, Treder M, Tyagi AK, Drlica K et al. (2000) Cloning and characterization of secretory tyrosine phosphatases of *Mycobacterium tuberculosis*. *J Bacteriol* 182: 5425-5432. doi: 10.1128/JB.182.19.5425-5432.2000. PubMed: 10986245.
- Singh R, Rao V, Shakila H, Gupta R, Khara A et al. (2003) Disruption of *mptpB* impairs the ability of *Mycobacterium tuberculosis* to survive in guinea pigs. *Mol Microbiol* 50: 751-762. doi:10.1046/j.1365-2958.2003.03712.x. PubMed: 14617138.
- Zhou B, He Y, Zhang X, Xu J, Luo Y et al. (2010) Targeting mycobacterium protein tyrosine phosphatase B for antituberculosis agents. *Proc Natl Acad Sci U S A* 107: 4573-4578. PubMed: 20167798.
- Hou S, Li X, Feng XZ (2009) Method to improve DNA condensation efficiency by alkali treatment. *Nucleosides Nucleotides Nucleic Acids* 28: 725-735. doi:10.1080/15257770903155493. PubMed: 20183612.
- Vilch ze C, Jacobs WR (2007) Isolation and analysis of *Mycobacterium tuberculosis* mycolic acids. *Curr Protoc Microbiol* Pp. 10A.3: Unit 10A. 3.1-10A.311. PubMed: 18770604
- Slyden RA, Barry CE 3rd (2001) Analysis of the Lipids of *Mycobacterium tuberculosis*. *Methods Mol Med* 54: 229-245. PubMed: 21341079.

## Author Contributions

Conceived and designed the experiments: PC AKT. Analyzed the data: PC PVR. Wrote the manuscript: PC AKT PVR RS. Provided overall supervision throughout the study: AKT. Generated *Mtb* $\Delta$ mptpB $\Delta$ mptpA strain: RS. Generated *Mtb* $\Delta$ mms strain: PVR. Performed all the experiments related to mutants: PC. Lipid analysis: NJ PC SG.

31. Reddy PV, Puri RV, Khera A, Tyagi AK (2012) Iron storage proteins are essential for the survival and pathogenesis of *Mycobacterium tuberculosis* in THP-1 macrophages and the guinea pig model of infection. *J Bacteriol* 194: 567-575. doi:10.1128/JB.05553-11. PubMed: 22101841.
32. Jain R, Dey B, Dhar N, Rao V, Singh R et al. (2008) Enhanced and enduring protection against tuberculosis by recombinant BCG-Ag85C and its association with modulation of cytokine profile in lung. *PLOS ONE* 3: e3869. doi:10.1371/journal.pone.0003869. PubMed: 19052643.
33. Kai M, Fujita Y, Maeda Y, Nakata N, Izumi S et al. (2007) Identification of trehalose dimycolate (cord factor) in *Mycobacterium leprae*. *FEBS Lett* 581: 3345-3350. PubMed: 17601578.
34. Giovannini D, Cappelli G, Jiang L, Castilletti C, Colone A et al. (2012) A new *Mycobacterium tuberculosis* smooth colony reduces growth inside human macrophages and represses PDIM Operon gene expression. Does an heterogeneous population exist in intracellular mycobacteria? *Microb Pathog* 53: 135-146. doi:10.1016/j.micpath.2012.06.002. PubMed: 22771837.
35. Bhatt A, Fujiwara N, Bhatt K, Gurcha SS, Kremer L et al. (2007) Deletion of *kasB* in *Mycobacterium tuberculosis* causes loss of acid-fastness and subclinical latent tuberculosis in immunocompetent mice. *Proc Natl Acad Sci U S A* 104: 5157-5162. doi:10.1073/pnas.0608654104. PubMed: 17360388.
36. Fine PE (1995) Variation in protection by BCG: implications of and for heterologous immunity. *Lancet* 346: 1339-1345. doi:10.1016/S0140-6736(95)92348-9. PubMed: 7475776.
37. Cole ST, Brosch R, Parkhill J, Garnier T, Churcher C et al. (1998) Deciphering the biology of *Mycobacterium tuberculosis* from the complete genome sequence. *Nature* 393: 537-544. doi:10.1038/31159. PubMed: 9634230.
38. Camacho LR, Ensergueix D, Perez E, Gicquel B, Guilhot C (1999) Identification of a virulence gene cluster of *Mycobacterium tuberculosis* by signature-tagged transposon mutagenesis. *Mol Microbiol* 34: 257-267. doi:10.1046/j.1365-2958.1999.01593.x. PubMed: 10564470.
39. Tufariello JM, Jacobs WR Jr., Chan J (2004) Individual *Mycobacterium tuberculosis* resuscitation-promoting factor homologues are dispensable for growth in vitro and in vivo. *Infect Immun* 72: 515-526. doi:10.1128/IAI.72.1.515-526.2004. PubMed: 14688133.
40. Puri RV, Reddy PV, Tyagi AK (2013) Secreted Acid Phosphatase (SapM) of *Mycobacterium tuberculosis* Is Indispensable for Arresting Phagosomal Maturation and Growth of the Pathogen in Guinea Pig Tissues. *PLOS ONE* 8: e70514. doi:10.1371/journal.pone.0070514. PubMed: 23923000.
41. Hsu T, Hingley-Wilson SM, Chen B, Chen M, Dai AZ et al. (2003) The primary mechanism of attenuation of *Bacillus Calmette-Guérin* is a loss of secreted lytic function required for invasion of lung interstitial tissue. *Proc Natl Acad Sci U S A* 100: 12420-12425. doi:10.1073/pnas.1635213100. PubMed: 14557547.
42. Shimono N, Morici L, Casali N, Cantrell S, Sidders B et al. (2003) Hypervirulent mutant of *Mycobacterium tuberculosis* resulting from disruption of the *mce1* operon. *Proc Natl Acad Sci U S A* 100: 15918-15923. doi:10.1073/pnas.2433882100. PubMed: 14663145.
43. Copenhagen RH, Sepulveda E, Armitage LY, Actor JK, Wanger A et al. (2004) A mutant of *Mycobacterium tuberculosis* H37Rv that lacks expression of antigen 85A is attenuated in mice but retains vaccinogenic potential. *Infect Immun* 72: 7084-7095. doi:10.1128/IAI.72.12.7084-7095.2004. PubMed: 15557632.
44. Sambandamurthy VK, Wang X, Chen B, Russell RG, Derrick S et al. (2002) A pantothenate auxotroph of *Mycobacterium tuberculosis* is highly attenuated and protects mice against tuberculosis. *Nat Med* 8: 1171-1174. doi:10.1038/nm765. PubMed: 12219086.
45. Baldwin SL, D'Souza C, Roberts AD, Kelly BP, Frank AA et al. (1998) Evaluation of new vaccines in the mouse and guinea pig model of tuberculosis. *Infect Immun* 66: 2951-2959. PubMed: 9596772.
46. McMurray DN (1994) Guinea pig model of tuberculosis. In: BR Bloom. *Tuberculosis: pathogenesis, protection, and control*. Washington, DC: American Society for Microbiology. pp.135-147.
47. McMurray DN (2001) Disease model: pulmonary tuberculosis. *Trends Mol Med* 7: 135-137. doi:10.1016/S1471-4914(00)01901-8. PubMed: 11286786.
48. Chambers MA, Williams A, Hatch G, Gavier-Widén D, Hall G et al. (2002) Vaccination of guinea pigs with DNA encoding the mycobacterial antigen MPB83 influences pulmonary pathology but not hematogenous spread following aerogenic infection with *Mycobacterium bovis*. *Infect Immun* 70: 2159-2165. doi:10.1128/IAI.70.4.2159-2165.2002. PubMed: 11895982.
49. Pym AS, Brodin P, Majlessi L, Brosch R, Demangel C et al. (2003) Recombinant BCG exporting ESAT-6 confers enhanced protection against tuberculosis. *Nat Med* 9: 533-539. doi:10.1038/nm859. PubMed: 12692540.
50. Kamath AT, Fruth U, Brennan MJ, Dobbelaer R, Hubrechts P et al. (2005) New live mycobacterial vaccines: the Geneva consensus on essential steps towards clinical development. *Vaccine* 23: 3753-3761. doi:10.1016/j.vaccine.2005.03.001. PubMed: 15893612.
51. Reddy PV, Puri RV, Chauhan P, Kar R, Rohilla A et al. (2013) Disruption of Mycobactin Biosynthesis Leads to Attenuation of *Mycobacterium tuberculosis* for Growth and Virulence. *J Infect Dis*, 208: 1255-65. doi:10.1093/infdis/jit250. PubMed: 23788726.
